# Supplementary material for: New SARS-CoV-2 Infection Detected in an Italian Pet Cat by RT-qPCR from Deep Pharyngeal Swab
Source: MDPI journal article supplement (doi:10.3390/pathogens9090746), 2020-09-11
Supplement: s1 [file s1]

**Figure S1. Amplification profiles for the detection of SARS-CoV-2.**

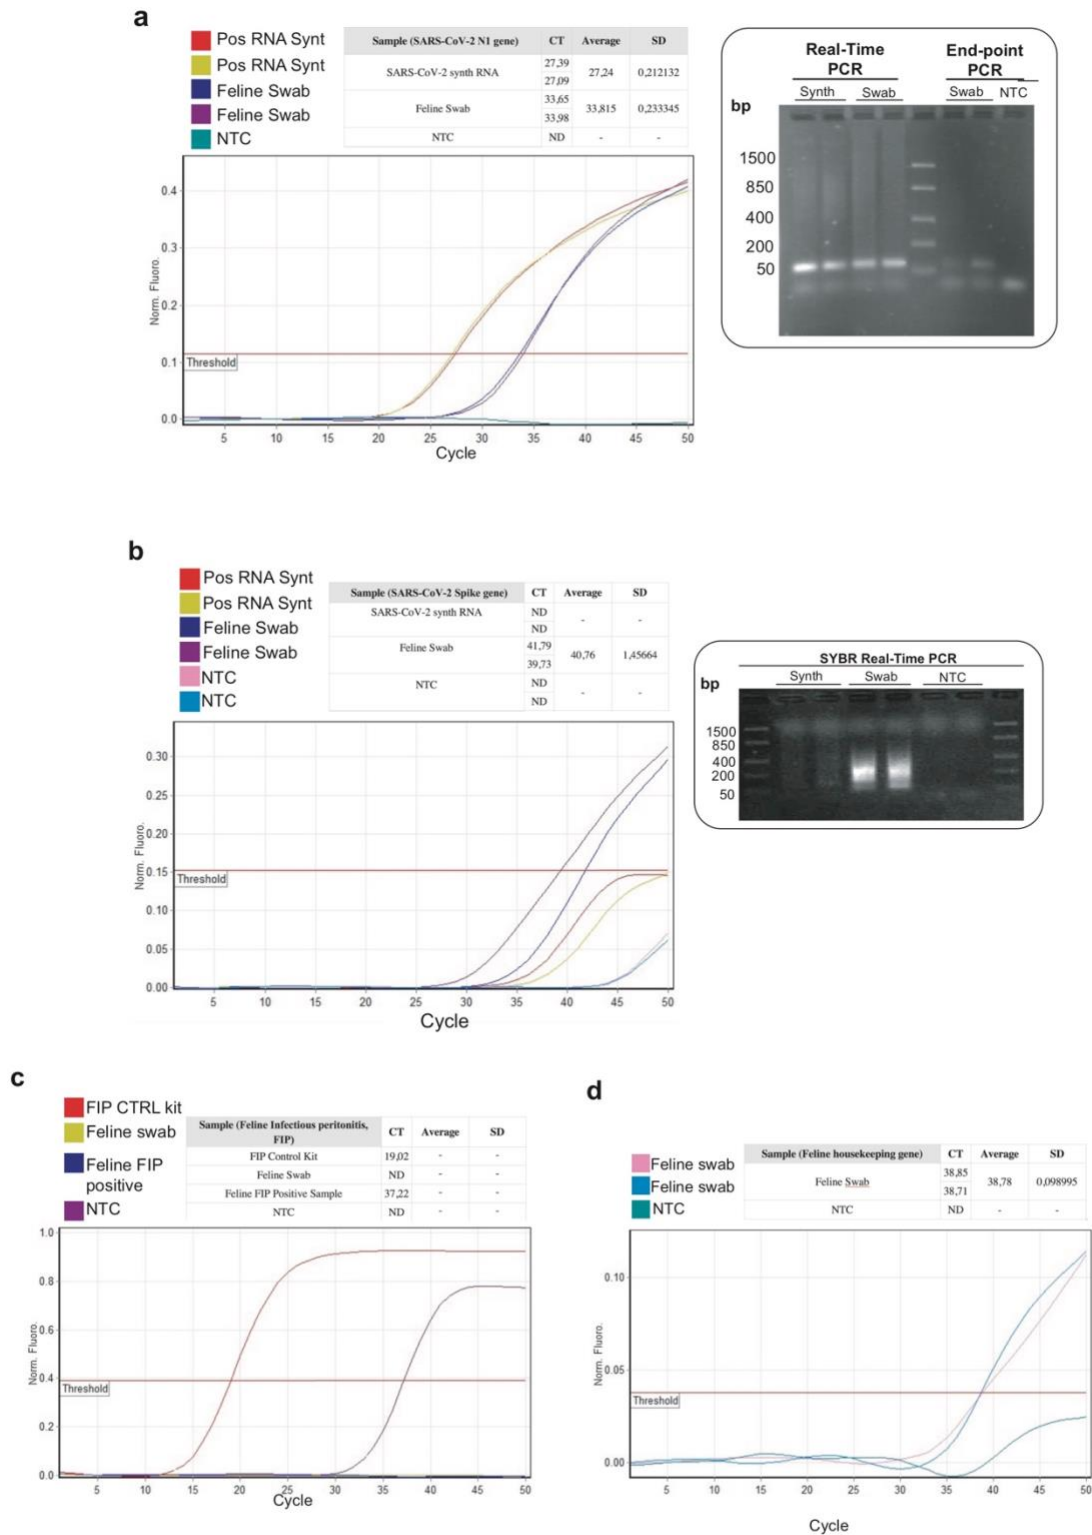

CT: cycle threshold, SD: standard deviation, ND: not detected, NTC: no template control.

**a)** RT-qPCR detection of SARS-CoV-2 N1 gene (left) and relative real-time and End-point PCR in 1,8% agarose gel (right); **b)** RT-qPCR detection of SARS-CoV-2 spike gene (left) and respective agarose fragment evaluation SYBR PCR (right). **c)** RT-qPCR detection of FIP; **d)** RT-qPCR detection of feline housekeeping gene (Techne-FCoV Kit).
