# Supplementary material for: New SARS-CoV-2 Infection Detected in an Italian Pet Cat by RT-qPCR from Deep Pharyngeal Swab
Source: Pathogens. 2020 Sep 11;9(9):746. doi: 10.3390/pathogens9090746 (PMC7559392; doi:10.3390/pathogens9090746)
Supplement: Supplementary file 1 [file pathogens-09-00746-s001.zip]

Archive with 4 entries (4 files):
- Figure S1.pdf
- __MACOSX/._Figure S1.pdf
- FigS2.tiff
- __MACOSX/._FigS2.tiff
